# Supplementary material for: Mitochondrial genomes of Columbicola feather lice are highly fragmented, indicating repeated evolution of minicircle-type genomes in parasitic lice
Source: PeerJ. 2020 Mar 23;8:e8759. doi: 10.7717/peerj.8759 (PMC7098387; doi:10.7717/peerj.8759)
Supplement: Supplemental Information 9 — Minicircles are named according to their coding genes. tRNAs are named with IUPAC amino acid letter abbreviations. [file peerj-08-8759-s009.xlsx]

## Sheet: Sheet1
	Minicircle	Average coverage	Average connection	Average quality	Average alignment score
C. columbae
	G-rrnS-N-F	141.39	138.4	35.57	-5.36
	L1-rrnL-V	100.98	97.13	36.43	-2.4
	D-atp6	283.16	276.98	36.36	-1.3
	E-atp8	661.38	646.07	35.9	-2
	I-cox1	278.04	274.84	36.5	-3.04
	S1-Y-cox2	34.67	34.04	36.6	-7.98
	P-cox3	101.21	100.58	35.64	-6.81
	S2-cob	291.15	285.45	36.03	-3.05
	K-nad1	619.22	607.96	35.63	-2.66
	P-nad2	83.7	81.81	36.22	-4.22
	nad3	80.14	76.95	18.65	-8.03
	nad4	284.66	277.94	36.31	-6.65
	R-nad4l	404.04	398.54	36.49	-2.55
	nad5	-	-	-	-
	T-nad6	34.67	34.04	36.6	-7.98
	L2-A-M-Q	284.66	277.94	36.31	-6.65
C. macrourae
	G-rrnS-N-S2	345.97	340.69	33.13	-3.65
	L2-rrnL-V	108.04	106.47	35.34	-3.24
	atp6	873.98	863.9	34.49	-2.24
	I-cox1	-	-	-	-
	Y-cox2	113.03	109.23	30.69	-5.5
	P-cox3	112.77	108.93	30.78	-5.63
	S2-cob	101.76	100.22	34.47	-5.06
	K-nad1	386.72	380.35	33.28	-3.47
	P-nad2	811.16	800.35	35.15	-2.26
	nad3	0.36	0.33	3.01	-11
	nad4	147.42	145.59	34.87	-1.96
	E-R-nad4l	23.31	22.37	32	-5.4
	W-nad5	-	-	-	-
	M-H-C	880	867.42	35.17	-2.17
	S-T-K	567.27	561.22	33.72	-2.09
C. passerinae 1
	G-N-rrnS	235.35	230.61	36.86	-4.41
	rrnL	0.31	0.28	5.41	-10.95
	E-atp6-S2	15.41	15.1	34.52	-7.2
	E-atp8-L2	49.55	48.07	36.81	-1.66
	I-cox1	-	-	-	-
	S1-Y-cox2	6.83	6.33	20.34	-7.35
	P-cox3	70.64	69.2	37.18	-3.61
	cob	131.81	130.45	37.64	-3.94
	K-nad1-E	109.06	107.66	38.3	-4.97
	P-nad2	13.25	12.51	17.39	-7.02
	E-nad3-L1	81.32	80.56	38.03	-5.77
	nad4	66.24	65.41	37.43	-5.63
	R-nad4l-M	14.92	14.72	38.74	-8.4
	nad5	-	-	-	-
	T-nad6	17.09	16.56	16.15	-4.9
	F-Q	89.39	87.44	37.27	-8.35
	C-P	146.74	143.88	37.88	-3.02
C. passerinae 2
	G-N-rrnS	200.22	197.49	36.91	-2.74
	rrnL	151.15	149.57	36.58	-6.18
	atp6-S2	291.85	288.38	36.32	-5.91
	D-atp8-A-L2	157.43	155.56	36.21	-0.93
	I-cox1	-	-	-	-
	S1-Y-cox2	211.25	207.11	36.42	-1.31
	P-cox3	192.63	190.32	36.91	-2.14
	cob	21.27	20.47	28.41	-6.49
	K-nad1	176.77	174.96	36.58	-5.86
	P-nad2	182.58	182.58	36.53	-5.73
	nad3-L1	198.54	196.12	36.53	-5.07
	nad4	-	-	-	-
	R-nad4l-M	143.02	141.18	35.71	-0.97
	W-nad5	152.23	147.74	35.48	-5.46
	T-nad6	213.87	209.36	36.67	-6.27
	M-F-Q	90.84	89.47	35.1	-1.62
	C-P	77.54	76.23	34.83	-1.76
