# Supplementary material for: Mitochondrial genomes of Columbicola feather lice are highly fragmented, indicating repeated evolution of minicircle-type genomes in parasitic lice
Source: PeerJ. 2020 Mar 23;8:e8759. doi: 10.7717/peerj.8759 (PMC7098387; doi:10.7717/peerj.8759)
Supplement: Table S4 — Minicircles are named according to their coding genes. tRNAs are named with IUPAC amino acid letter abbreviations. [file peerj-08-8759-s012.xlsx]

## Sheet: Sheet1
	Minicircle	Length	AT% coding	AT% non-coding	AT% total
C. columbae
	G-rrnS-N-F	2531	67	68.3	67.8
	L1-rrnL-V	1818	68.7	66.4	69.1
	D-atp6	1916	69.2	68.2	68.7
	E-atp8	1192	71.9	71.3	71.5
	I-cox1	2631	64.5	65.9	65.1
	S1-Y-cox2	1793	65.4	68.2	67.2
	P-cox3	2077	67.3	67.5	67.5
	S2-cob	2095	64.6	68.4	66.3
	K-nad1	1936	66.4	68.9	67.8
	P-nad2	2265	70.7	71.3	71.3
	nad3	1119	70.4	74.1	72.9
	nad4	1726	65.9	70.4	68.1
	R-nad4l	1752	71.5	69	69.7
	nad5	2657	69.3	67.4	68.2
	T-nad6	1379	68.3	67.5	68.1
	L2-A-M-Q	1392	75.3	66.7	68.2
C. macrourae
	G-rrnS-N-S2	1920	63.4	58.5	60.8
	L2-rrnL-V	3173	65.4	58.5	60.9
	atp6	2408	62.2	57.1	58.5
	I-cox1	1667	58.4	58.4	58.4
	Y-cox2	2899	61.8	57.5	58.6
	P-cox3	2462	61.8	56.7	58.5
	S2-cob	2949	60.1	62.7	58.5
	K-nad1	2942	59.1	60.6	58.3
	P-nad2	2056	61.9	66.3	57.7
	nad3	1536	63.8	57	58.6
	nad4	2048	62.1	59.4	61.1
	E-R-nad4l	2179	68.8	56.7	58.9
	W-nad5	1450	65.2	57.9	61.4
	M-H-C	1613	69	57.4	58.8
	S-T-K	1834	68.4	58	59.1
C. passerinae 1
	G-N-rrnS	2966	69.9	61.3	63.8
	rrnL	3115	66.5	63.6	64.6
	E-atp6-S2	1497	69.4	65.1	67.7
	E-atp8-L2	1348	75	64.2	66.6
	I-cox1	2320	63.9	63.2	63.7
	S1-Y-cox2	2292	66.3	64	64.8
	P-cox3	3039	67	65	65.6
	cob	2607	65.7	64.5	64.9
	K-nad1-E	2786	68.4	64.1	65.7
	P-nad2	2302	69.5	63.5	66.2
	E-nad3-L1	1935	69.6	64.8	66
	nad4	3167	66.6	63.4	64.8
	R-nad4l-M	1879	70.2	62.5	64.1
	nad5	2055	68.4	64.4	66.3
	T-nad6	2265	68.7	63.2	64.5
	F-Q	1250	74.6	62.1	63.4
	C-P	1261	75.6	63.3	64.7
C. passerinae 2
	G-N-rrnS	2086	69	62.6	65.2
	rrnL	2350	66.5	61.5	63.8
	atp6-S2	2045	67.2	62.6	64.3
	D-atp8-A-L2	1804	68.4	62.3	63.9
	I-cox1	2830	62.7	62.9	62.8
	S1-Y-cox2	2037	65.7	63	64.1
	P-cox3	2037	66.8	63.1	64.7
	cob	2325	65.9	63.8	64.8
	K-nad1	2289	65.6	62.2	63.7
	P-nad2	2278	68.1	63.2	65.5
	nad3-L1	1824	68.4	64	65.1
	nad4	2494	65.8	63.4	64.7
	R-nad4l-M	1811	68.2	63.3	64.4
	W-nad5	2862	67.5	61.5	65.1
	T-nad6	1948	66.4	63.1	64
	M-F-Q	1654	70.4	62.6	63.5
	C-P	1271	74.8	62.4	63.7
